# Supplementary material for: Structural Properties of [N1888][TFSI] Ionic Liquid: A Small Angle Neutron Scattering and Polarizable Molecular Dynamics Study
Source: PubMed Central journal article supplement (PMC11571223; doi:10.1021/acs.jpcb.4c06255), 2024-11-05
Supplement: jp4c06255_si_004.pdf [file jp4c06255_si_004.pdf]

# Supporting Information for "Structural Properties of [N1888][TFSI] Ionic Liquid: A Small Angle Neutron Scattering and Polarizable Molecular Dynamics Study"

Shehan M. Parmar,<sup>†</sup> William Dean,<sup>‡</sup> Changwoo Do,<sup>¶</sup> James F. Browning,<sup>¶</sup> Jeffrey M. Klein,<sup>§</sup> Burcu E. Gurkan,<sup>‡</sup> and Jesse G. McDaniel<sup>\*,†</sup>

<sup>†</sup>*Department of Chemistry and Biochemistry, Georgia Institute of Technology, Atlanta, GA, 30332, USA*

<sup>‡</sup>*Chemical and Biomolecular Engineering Department, Case Western Reserve University, Cleveland, Ohio, 44106, USA*

<sup>¶</sup>*Neutron Scattering Division, Oak Ridge National Laboratory, Oak Ridge, TN, 37831, USA*

<sup>§</sup>*MPA-11: Materials Synthesis and Integrated Devices, Los Alamos National Laboratory, Los Alamos, NM, 87545, USA*

\* E-mail: [mcdaniel@gatech.edu](mailto:mcdaniel@gatech.edu)

# Contents

|                                                        |     |
|--------------------------------------------------------|-----|
| S1 Matrix of all Simulation Conditions                 | S3  |
| S2 Force Field Benchmarks                              | S4  |
| S3 Density as function of temperature and domain size  | S5  |
| S4 Structure Factor Temperature-dependence             | S8  |
| S5 Structure Factor Peak Location Comparisons at 300 K | S8  |
| S6 Partial Structure Factor Partitioning               | S8  |
| S7 Charge-correlation Structure Factor                 | S9  |
| S8 Carbon-carbon Atomistic RDF                         | S10 |

# S1 Matrix of all Simulation Conditions

Table S1: Summary of simulation conditions for corresponding analyses.

| Ion Pairs | Temperature [K] | Total Simulation Time [ns] | ns/GPU hr | Property                                              | Figure Numbers     |
|-----------|-----------------|----------------------------|-----------|-------------------------------------------------------|--------------------|
| 200       | 300             | 300                        | 1.42      | $S_{ZZ}, E_{coh}$ , density                           | 2, S2, S3          |
|           | 350             | 60                         | 1.49      | $E_{coh}$ , density                                   | S2, S3             |
|           | 400             | 60                         | 1.58      | $E_{coh}$ , density                                   | S2, S3             |
|           | 450             | 60                         | 1.60      | density                                               | S3                 |
|           | 500             | 60                         | 1.58      | density                                               | S3                 |
| 900       | 300             | 300                        | 0.33      | $S_{ZZ}$ , density                                    | 2, S3              |
|           | 400             | 80                         | 0.36      | density                                               | S3                 |
| 1600      | 300             | 966                        | 0.17      | $S_{ZZ}, S_{NN}, g(r)$ , CDFs, SDFs, $P(d)$ , density | 2, 4-10, S1, S3-S5 |
|           | 350             | 100                        | 0.18      | density                                               | S3                 |
|           | 400             | 200                        | 0.19      | $S_{NN}$ , density                                    | S3-S5              |
|           | 450             | 100                        | 0.19      | $S_{NN}$ , density                                    | S3-S5              |
|           | 500             | 100                        | 0.19      | $S_{NN}$ , density                                    | S3-S5              |

In Table S1, we summarize the simulation conditions for the corresponding property calculations. The total simulation times were chosen based on a tradeoff between computational complexity and desired property—i.e., properties such as density required less production simulation time than structure factor calculations. The computational complexity is highlighted in ns/GPU hours, where the primary simulation used in this work, 1600 ion pairs at 300 K, required  $\sim 10^3$  GPU hours.

For simulations longer than 200 ns, total simulation time was acquired by running multiple simulations in parallel using equally-spaced trajectories from an equilibration simulation. Concretely, the 1600 ion pair system was first equilibrated at 500 K for 100 ns in the NPT ensemble. Equally-spaced trajectory frames from the equilibrated, 500 K system were used as initial starting trajectories for subsequent 1 K/ns annealing simulations down to 300 K. Annealing was then followed by independent,  $\sim 100$ – $125$  ns simulations to ultimately acquire the cumulative simulation times provided throughout Table S1.

## S2 Force Field Benchmarks

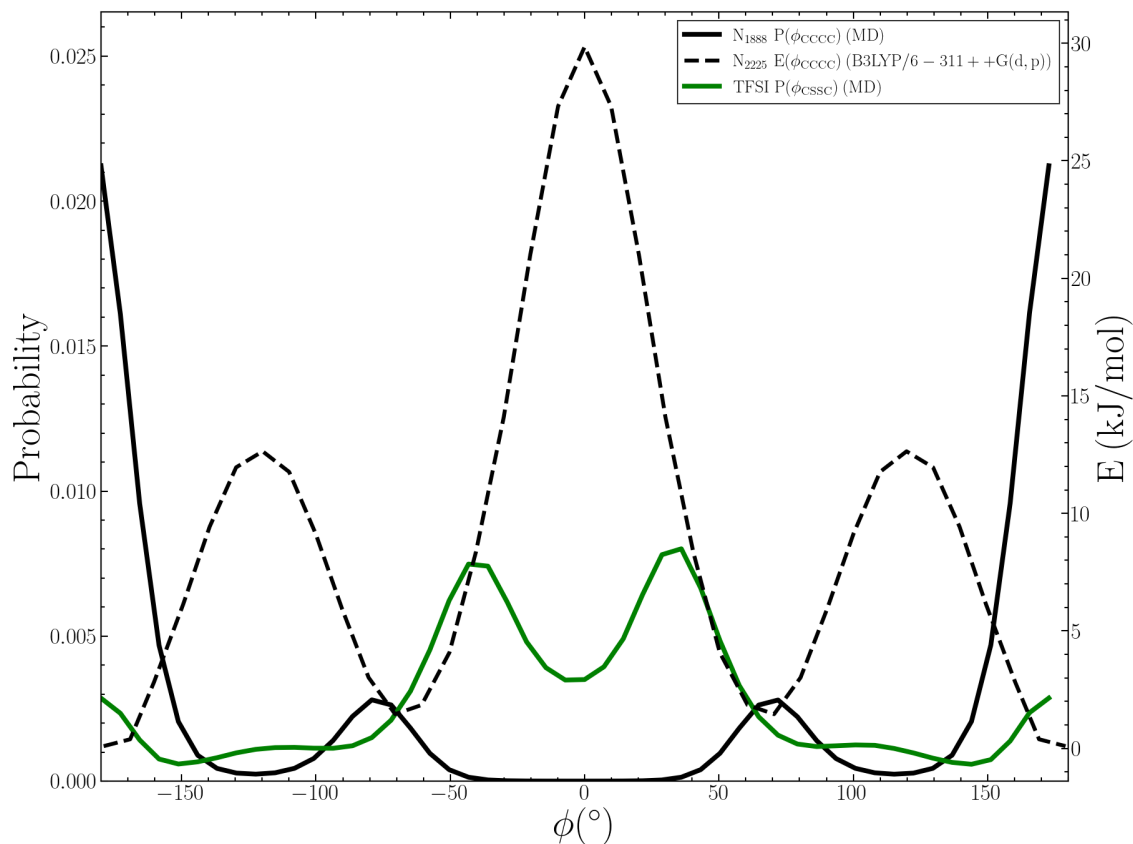

Figure S1: Dihedral distribution functions (DDFs) for (solid black) all C-C-C-C dihedral angles present in  $N_{1888}$  and (solid green) “pseudo” C-S-S-S dihedral angles present in TFSI. Quantum mechanical (dashed black) potential energy scan of C-C-C-C dihedral angle in  $N_{2225}$  from Ghatee and Bahrami<sup>106</sup> provided for qualitative comparison.

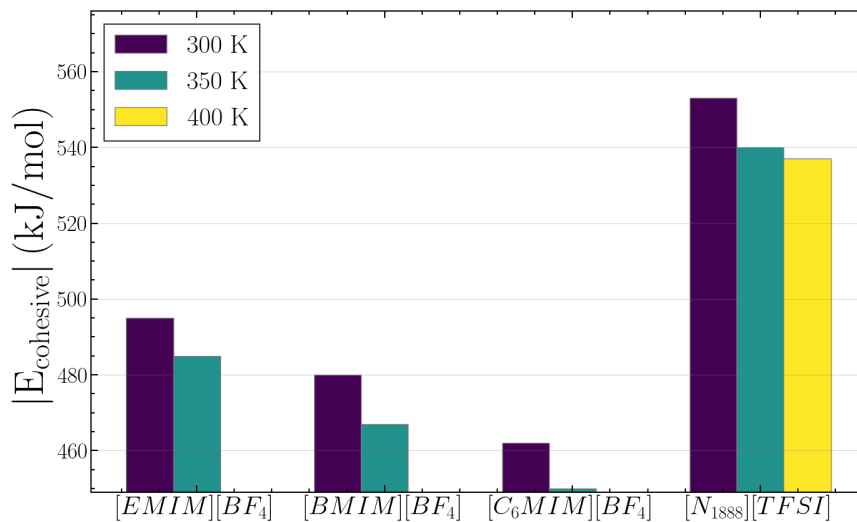

Figure S2: Liquid cohesive energies of [N<sub>1888</sub>][TFSI] compared to commonly studied ILs.<sup>99</sup>

### S3 Density as function of temperature and domain size

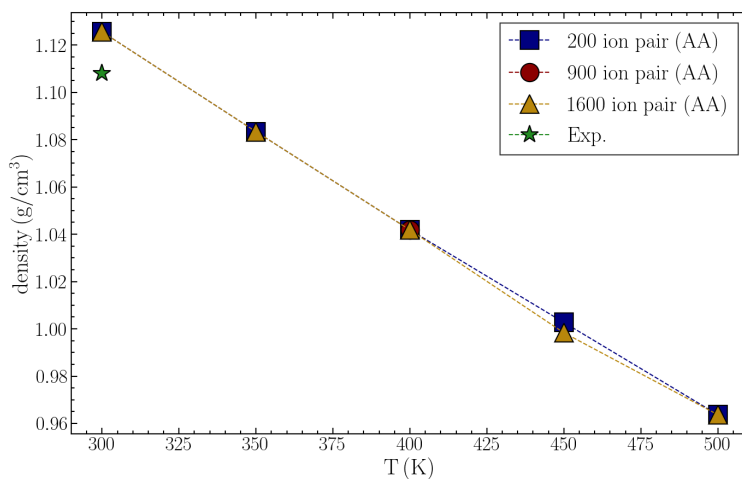

Figure S3: Density as a function of temperature at varied system sizes

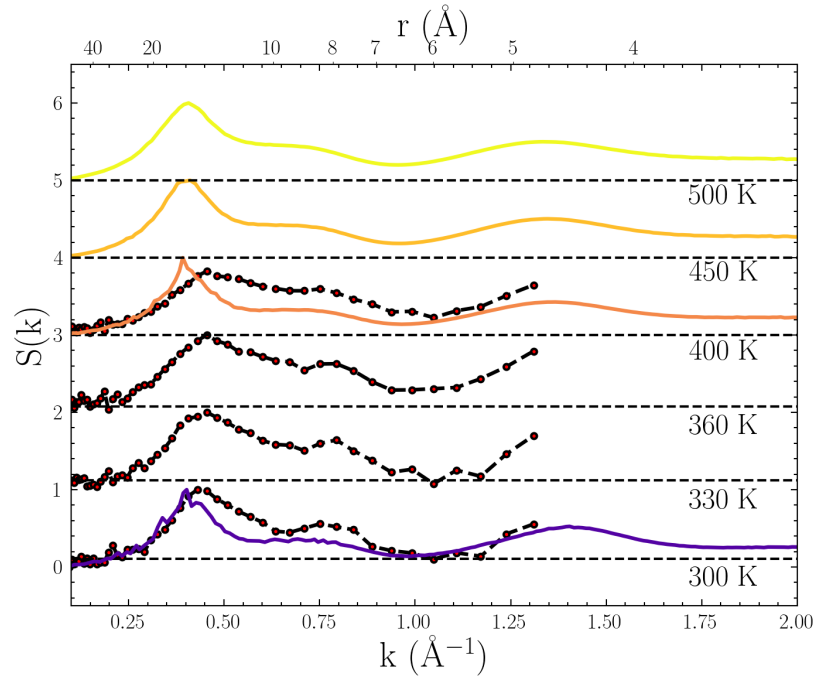

(a)

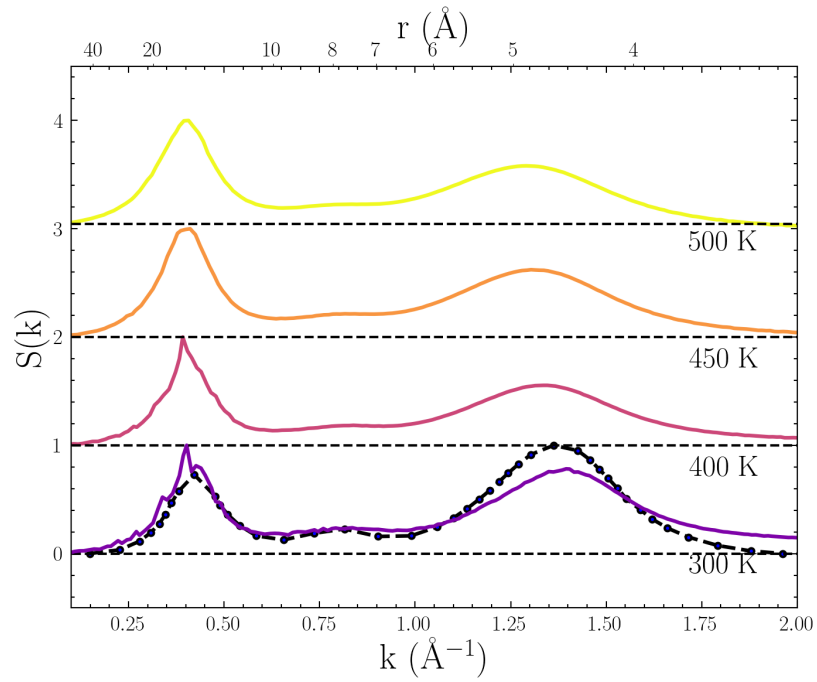

(b)

Figure S4: Measured SANS (S4a) and SAXS (S4b) and simulated structure factors for  $[N_{188}][TFSI]$  at four temperatures each. Red (S4a) and blue (S4b) circles are measured SANS/SAXS data and smooth lines are calculated from MD simulations.

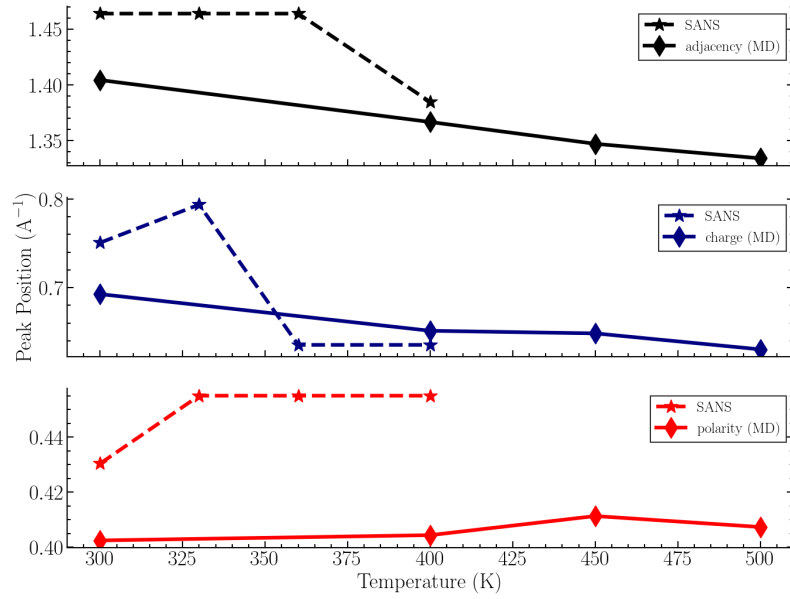

(a)

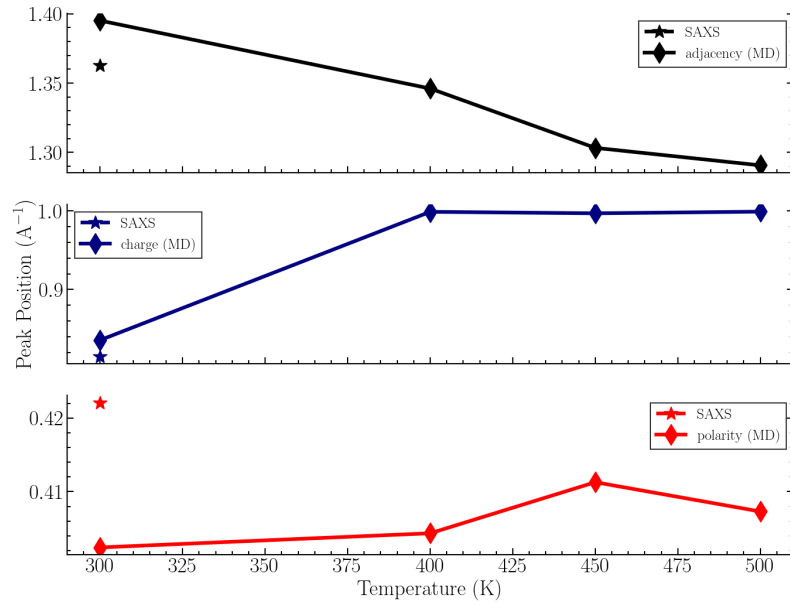

(b)

Figure S5: Temperature-dependence of peak location for neutron (S5a) and x-ray (S5b) scattering structure factors from Fig. S4. Simulated structure factors are shown as diamonds and experimental measurements are as stars.

## S4 Structure Factor Temperature-dependence

## S5 Structure Factor Peak Location Comparisons at 300 K

Table S2: Experimental and simulation comparison of peak locations for respective domains in scattering structure factors at 300 K.

| <b>S(k)</b> | <b>Domain</b> | <b>SAXS/SANS (<math>\text{\AA}^{-1}</math>)</b> | <b>MD (<math>\text{\AA}^{-1}</math>)</b> | <b><math>\Delta\%</math></b> |
|-------------|---------------|-------------------------------------------------|------------------------------------------|------------------------------|
| X-ray       | Polarity      | 0.422                                           | 0.402                                    | 4.76                         |
|             | Charge        | 0.815                                           | 0.836                                    | 2.51                         |
|             | Adjacency     | 1.363                                           | 1.395                                    | 2.36                         |
| Neutron     | Polarity      | 0.430                                           | 0.402                                    | 6.51                         |
|             | Charge        | 0.751                                           | 0.693                                    | 7.72                         |
|             | Adjacency     | 1.464                                           | 1.404                                    | 4.10                         |

## S6 Partial Structure Factor Partitioning

The polarity domain is partitioned based on the polar and apolar contributions, where the total structural factor is decomposed into

$$S_{NN}(\mathbf{k}) = S^{p-p}(\mathbf{k}) + S^{ap-ap}(\mathbf{k}) + S^{p-ap}(\mathbf{k}), \quad (\text{S1})$$

where the polar-polar, apolar-apolar, and polar-apolar components follow previous work,<sup>93</sup>

$$S^{p-p}(\mathbf{k}) = S^{an-an}(\mathbf{k}) + S^{cat_{head}-cat_{head}}(\mathbf{k}) + S^{cat_{head}-an}(\mathbf{k}) + S^{an-cat_{head}}(\mathbf{k}), \quad (\text{S2})$$

$$S^{ap-ap}(\mathbf{k}) = S^{cat_{tail}-cat_{tail}}(\mathbf{k}), \quad (\text{S3})$$

$$S^{p-ap}(\mathbf{k}) = S^{cat_{head}-cat_{tail}}(\mathbf{k}) + S^{cat_{tail}-cat_{head}}(\mathbf{k}) + S^{cat_{tail}-an}(\mathbf{k}) + S^{an-cat_{tail}}(\mathbf{k}). \quad (\text{S4})$$



The charge domain is partitioned based on the cation and anion contributions,

$$S_{NN}(\mathbf{k}) = S^{+/+}(\mathbf{k}) + S^{-/-}(\mathbf{k}) + S^{+/-}(\mathbf{k}) + S^{-/+}(\mathbf{k}), \quad (\text{S5})$$

where the adjacency domain's intermolecular and intramolecular components arise from

$$S^{+/+}(\mathbf{k}) = S^{+/+,intra}(\mathbf{k}) + S^{+/+,inter}(\mathbf{k}), \quad (\text{S6})$$

$$S^{-/-}(\mathbf{k}) = S^{-/-,intra}(\mathbf{k}) + S^{-/-,inter}(\mathbf{k}). \quad (\text{S7})$$

## S7 Charge-correlation Structure Factor

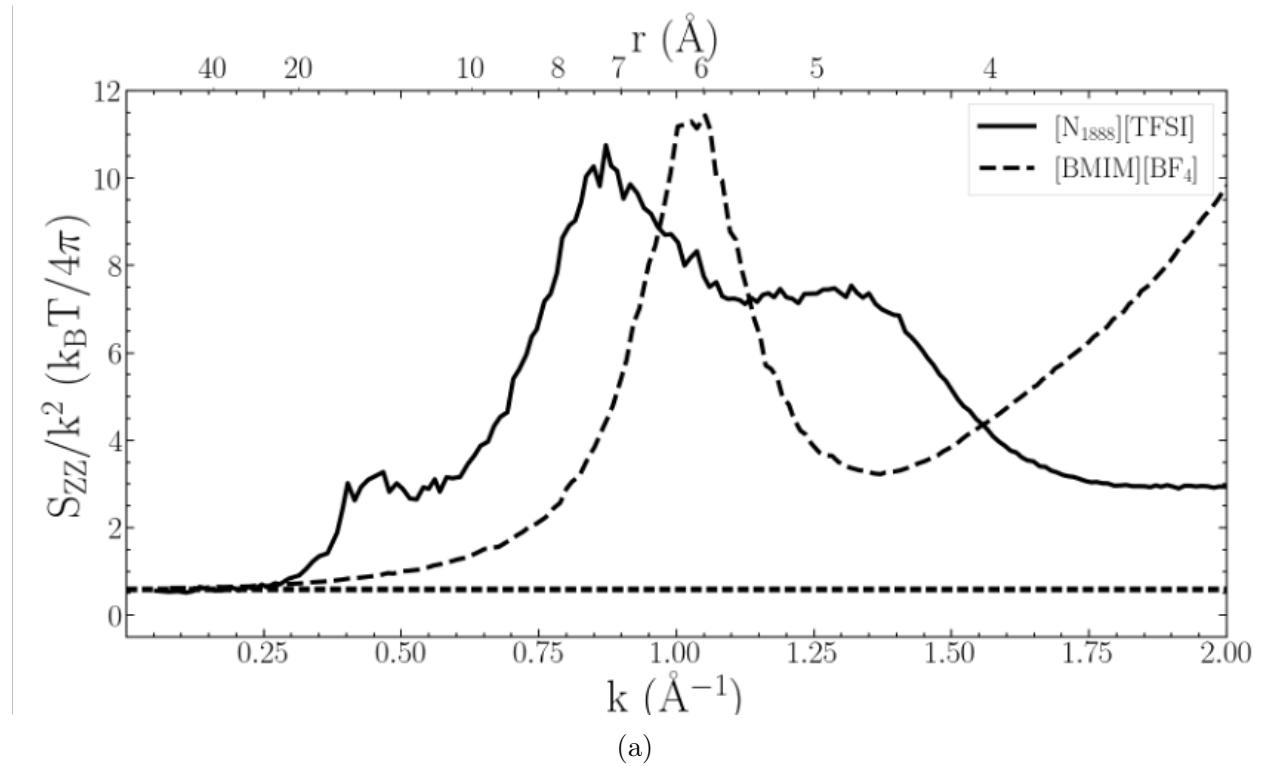

Figure S6: Charge-correlation structure factor comparison between  $[N_{1888}][TFSI]$  and  $[BMIM][BF_4]$

## S8 Carbon-carbon Atomistic RDF

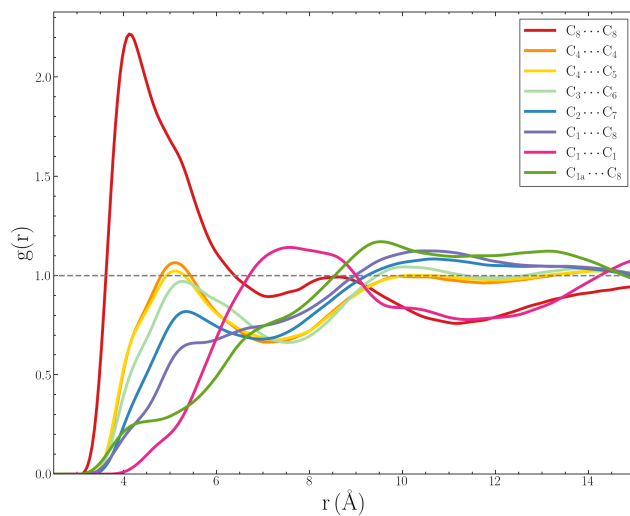

Figure S7: Carbon-carbon radial distribution functions, where  $C_1$ ,  $C_2$ ,  $C_3$ ,  $C_4$ ,  $C_5$ , and  $C_8$  are carbon atoms of the octyl chain number in order of closest ( $C_1$ ) to furthest ( $C_8$ ) from the nitrogen center.  $C_{1a}$  follows the same notation as Santos et al.<sup>80</sup> for the *N*-methyl carbon.
